# Supplementary material for: EFSA Health Claims-Based Virgin Olive Oil Shelf-Life
Source: MDPI journal article supplement (doi:10.3390/antiox12081563), 2023-08-04
Supplement: s1 [file s1]

**Table S1.** Degradation rate constants (*k*) for  $\alpha$ -linolenic acid (C18:3),  $\alpha$ -tocopherol, and hydroxytyrosol, tyrosol and its derivatives at the experimental temperatures studied.

|                                                                                        |               | 25 °C                      |                 | 40 °C                      |                 | 50 °C                      |                 | 60 °C                      |                 |
|----------------------------------------------------------------------------------------|---------------|----------------------------|-----------------|----------------------------|-----------------|----------------------------|-----------------|----------------------------|-----------------|
|                                                                                        | <i>Sample</i> | <i>k</i> /10 <sup>-3</sup> | *R <sup>2</sup> |
| <b>C18:3</b> <sup>1</sup><br><i>k</i> / % weeks <sup>-1</sup>                          | <i>I</i>      | -0.76                      | 0.853           | -3.05                      | 0.916           | -6.38                      | 0.985           | -12.69                     | 0.986           |
|                                                                                        | <i>II</i>     | -0.42                      | 0.787           | -2.04                      | 0.892           | -4.74                      | 0.955           | -8.85                      | 0.989           |
|                                                                                        | <i>III</i>    | -0.75                      | 0.896           | -3.11                      | 0.909           | -6.52                      | 0.957           | -12.4                      | 0.983           |
|                                                                                        | <i>IV</i>     | -0.69                      | 0.858           | -2.59                      | 0.913           | -4.81                      | 0.893           | -10.71                     | 0.990           |
|                                                                                        | <i>V</i>      | -0.64                      | 0.842           | -2.24                      | 0.881           | -4.34                      | 0.954           | -10.13                     | 0.977           |
|                                                                                        | <i>VI</i>     | -0.60                      | 0.876           | -1.79                      | 0.859           | -3.84                      | 0.921           | -7.98                      | 0.970           |
|                                                                                        | <i>VII</i>    | -0.54                      | 0.696           | -2.10                      | 0.931           | -4.65                      | 0.980           | -8.64                      | 0.971           |
| <b><math>\alpha</math>-tocopherol</b><br><sup>2</sup><br><i>k</i> /weeks <sup>-1</sup> |               | <i>k</i> /10 <sup>-2</sup> | *R <sup>2</sup> |
|                                                                                        | <i>I</i>      | -0.30                      | 0.849           | -2.20                      | 0.968           | -9.12                      | 0.884           | -18.65                     | 0.971           |
|                                                                                        | <i>II</i>     | -0.19                      | 0.703           | -0.95                      | 0.918           | -5.41                      | 0.637           | -12.57                     | 0.973           |
|                                                                                        | <i>III</i>    | -0.26                      | 0.798           | -1.42                      | 0.919           | -5.16                      | 0.803           | -20.17                     | 0.968           |
|                                                                                        | <i>IV</i>     | -0.27                      | 0.714           | -2.02                      | 0.954           | -13.34                     | 0.973           | -30.59                     | 0.955           |
|                                                                                        | <i>V</i>      | -0.21                      | 0.776           | -1.46                      | 0.958           | -8.76                      | 0.971           | -28.51                     | 0.944           |
|                                                                                        | <i>VI</i>     | -0.35                      | 0.850           | -1.21                      | 0.932           | -9.25                      | 0.949           | -26.62                     | 0.960           |
|                                                                                        | <i>VII</i>    | -0.25                      | 0.776           | -1.14                      | 0.970           | -7.81                      | 0.906           | -25.76                     | 0.949           |
| <b>Htyr, tyr and derivatives</b> <sup>2</sup><br><i>k</i> /weeks <sup>-1</sup>         |               | <i>k</i> /10 <sup>-2</sup> | *R <sup>2</sup> |
|                                                                                        | <i>I</i>      | -0.846                     | 0.866           | -1.88                      | 0.840           | -4.17                      | 0.964           | -10.95                     | 0.980           |
|                                                                                        | <i>II</i>     | -0.974                     | 0.845           | -1.49                      | 0.844           | -4.29                      | 0.974           | -8.80                      | 0.972           |
|                                                                                        | <i>III</i>    | -1.39                      | 0.909           | -2.89                      | 0.772           | -5.37                      | 0.911           | -14.85                     | 0.933           |
|                                                                                        | <i>IV</i>     | -1.05                      | 0.804           | -2.23                      | 0.789           | -4.02                      | 0.825           | -13.05                     | 0.958           |
|                                                                                        | <i>V</i>      | -1.15                      | 0.838           | -2.33                      | 0.896           | -4.25                      | 0.926           | -11.20                     | 0.994           |
|                                                                                        | <i>VI</i>     | -0.656                     | 0.852           | -2.08                      | 0.893           | -4.53                      | 0.995           | -10.17                     | 0.990           |
|                                                                                        | <i>VII</i>    | -0.587                     | 0.738           | -2.05                      | 0.849           | -4.76                      | 0.940           | -10.94                     | 0.985           |

<sup>1</sup> Pseudo zero-order kinetics:  $C = C_0 + kt$

\*P<0.05

<sup>2</sup> Pseudo first-order kinetics:  $\ln C = \ln C_0 + kt$

**Table S2.** Calculated Time (weeks) required to reach the limits for Declining the Health Claims (TLHC, weeks) for  $\alpha$ -linolenic acid (C18:3),  $\alpha$ -tocopherol, and hydroxytyrosol, tyrosol and its derivatives as compared with the experimental ones

|                                                     | <i>Sample</i> | 25 °C    |     | 40 °C    |     | 50 °C    |     | 60 °C    |     |
|-----------------------------------------------------|---------------|----------|-----|----------|-----|----------|-----|----------|-----|
|                                                     |               | TLH<br>C | Exp | TLH<br>C | Exp | TLH<br>C | Exp | TLH<br>C | Exp |
| <b>C18:3</b><br>= 0.30 g/100<br>g                   | <i>I</i>      | 543.2    | nr  | 135.4    | nr  | 64.7     | nr  | 32.5     | nr  |
|                                                     | <i>II</i>     | 706.5    | nr  | 145.5    | nr  | 62.6     | nr  | 33.5     | nr  |
|                                                     | <i>III</i>    | 469.9    | nr  | 113.3    | nr  | 54.0     | nr  | 28.4     | nr  |
|                                                     | <i>IV</i>     | 415.9    | nr  | 110.8    | nr  | 59.7     | nr  | 26.8     | 12. |
|                                                     | <i>V</i>      | 438.1    | nr  | 125.2    | nr  | 64.6     | nr  | 27.7     | 5   |
|                                                     | <i>VI</i>     | 408.7    | nr  | 137.0    | nr  | 63.9     | nr  | 30.7     | 19. |
|                                                     | <i>VII</i>    | 510.2    | nr  | 131.2    | nr  | 59.3     | nr  | 31.9     | 0   |
| <b><math>\alpha</math>-tocopherol</b><br>= 18 mg/kg | <i>I</i>      | 859.4    | nr  | 112.8    | nr  | 27.4     | 24  | 13.8     | 17. |
|                                                     | <i>II</i>     | 1234.    | nr  |          |     |          | 27  |          | 5   |
|                                                     | <i>III</i>    | 4        | nr  | 237.2    | nr  | 42.9     |     | 18.9     |     |
|                                                     | <i>IV</i>     | 976.3    | nr  | 172.9    | nr  | 49.7     | nr  | 12.8     | 16  |
|                                                     | <i>V</i>      | 822.3    | nr  | 105.1    | nr  | 16.6     | 16  | 7.3      | 7   |
|                                                     | <i>VI</i>     | 1132.    | nr  |          |     |          | 26  |          | 9   |
|                                                     | <i>VII</i>    | 5        | nr  | 155.5    | nr  | 27.0     |     | 8.3      |     |
| <b>Htyr, tyr and<br/>derivatives</b><br>= 250 mg/kg | <i>I</i>      | 588.4    | nr  | 156.8    | nr  | 22.0     | 16  | 7.7      | 8.5 |
|                                                     | <i>II</i>     | 861.1    | nr  | 176.5    | nr  | 26.2     | 23  | 8.2      | 9   |
|                                                     | <i>III</i>    |          |     |          |     |          |     |          |     |
|                                                     | <i>IV</i>     |          |     |          |     |          |     |          |     |
|                                                     | <i>V</i>      |          |     |          |     |          |     |          |     |
|                                                     | <i>VI</i>     |          |     |          |     |          |     |          |     |
|                                                     | <i>VII</i>    |          |     |          |     |          |     |          |     |

nr =the limit value was not reached during the experimental period; Exp = approximate experimental weeks

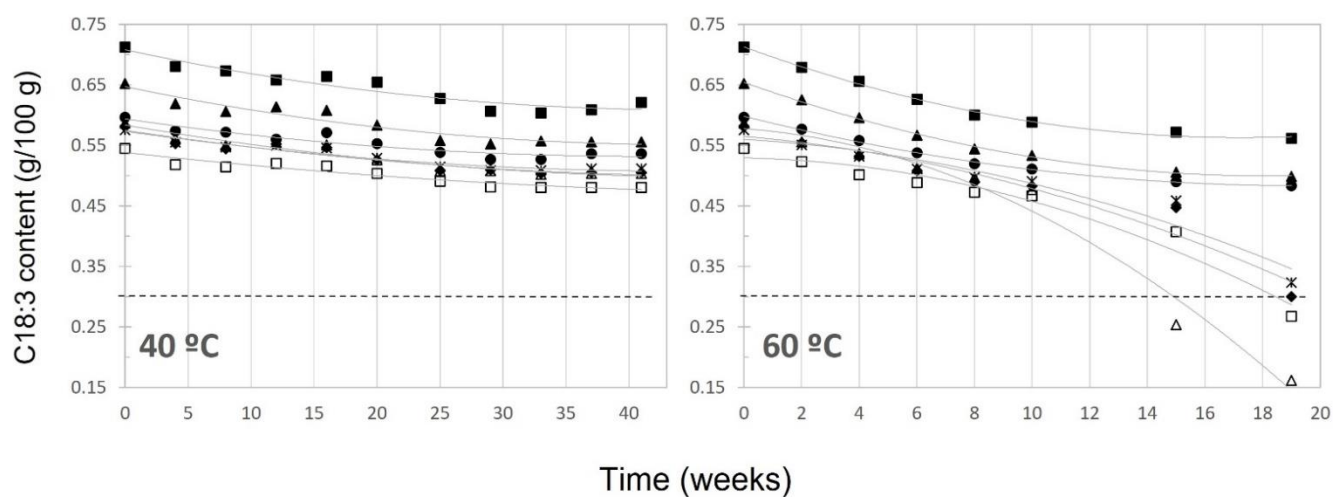

**Figure S1.** Content of  $\alpha$ -linolenic acid (C18:3) along the storage period at 40 and 60 °C  
 Samples: ■, I; ●, II; ▲, III; △, IV; ◆, V; □, VI; \*, VII

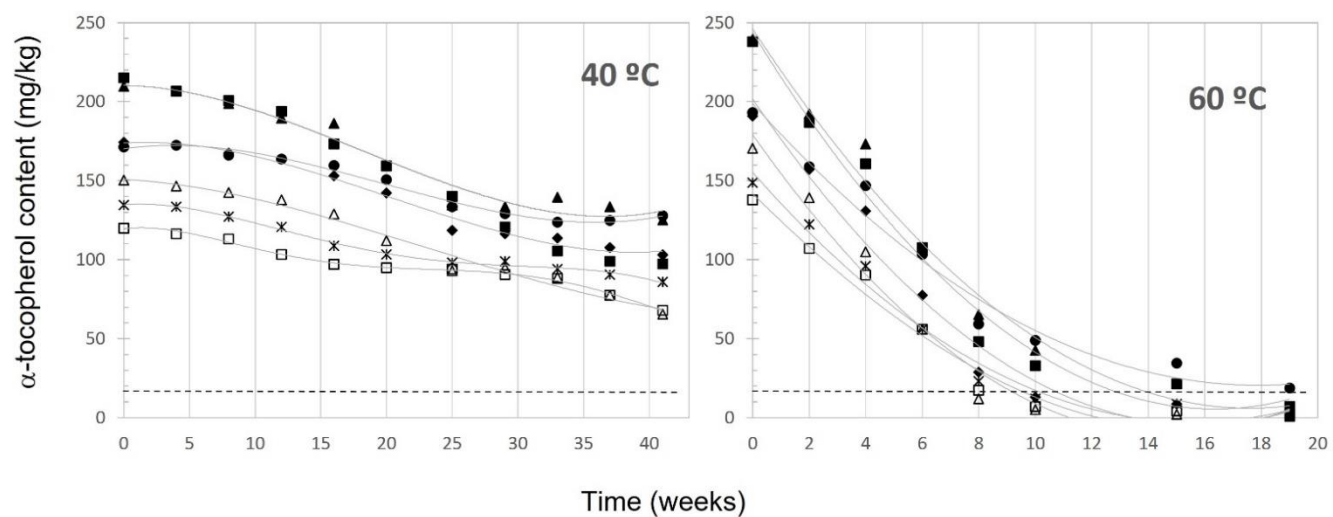

**Figure S2.** Content of  $\alpha$ -tocopherol along the storage period at 40 and 60 °C  
 Samples: ■, I; ●, II; ▲, III; △, IV; ◆, V; □, VI; \*, VII

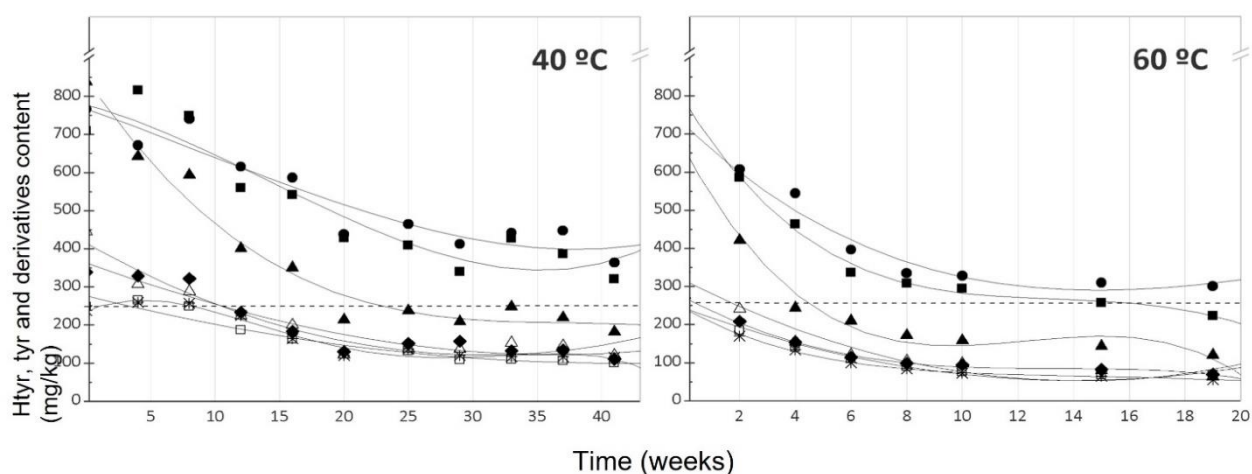

**Figure S3.** Content of hydroxytyrosol, tyrosol and derivatives along the storage period at 40 and 60 °C

Samples: ■, I; ●, II; ▲, III; △, IV; ◆, V; □, VI; \*, VII

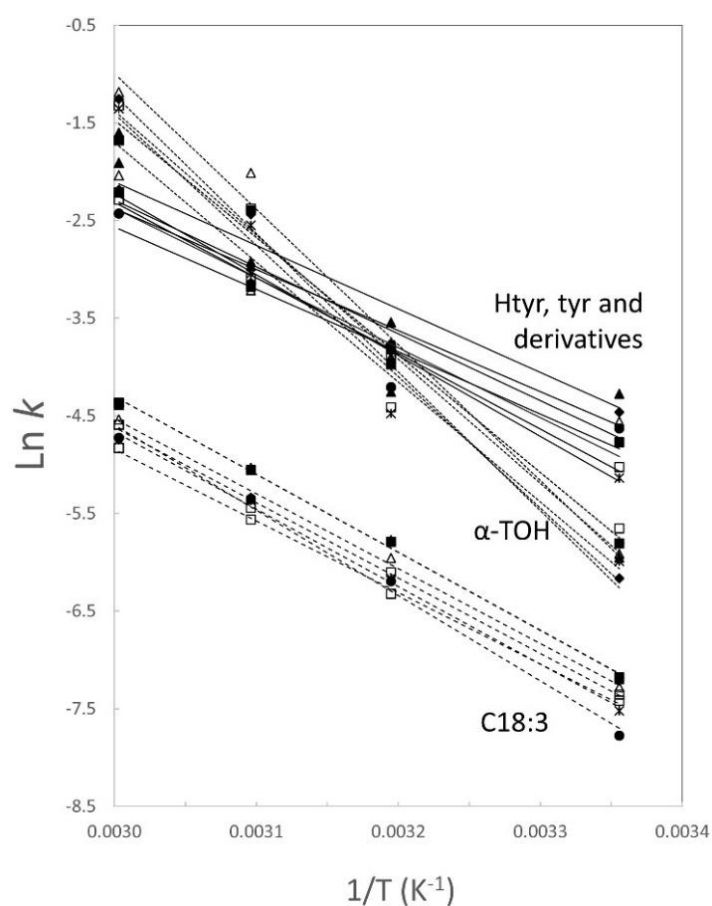

**Figure S4.** Arrhenius plot: Effect of temperature (T) on oxidation rate constants ( $k$ )  

$$\ln k = \ln A - \frac{E_a}{RT}$$

Samples: ■, I; ●, II; ▲, III; △, IV; ◆, V; □, VI; \*, VII

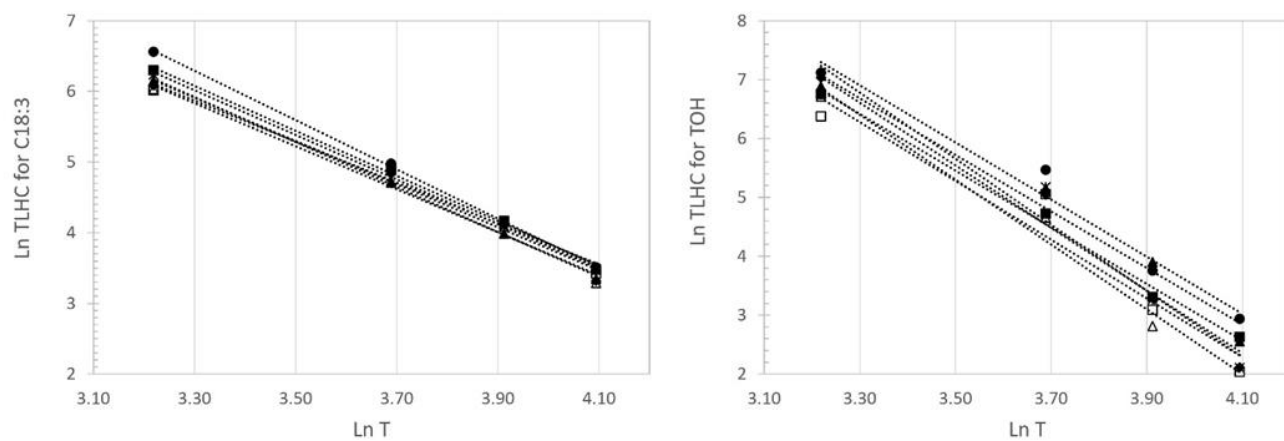

**Figure S5.** Correlation between TLHC for  $\alpha$ -linolenic acid (C18:3) and  $\alpha$ -tocopherol (TOH) and temperature (T)

TDHC =  $aT^b$

Samples: ■, I; ●, II; ▲, III; △, IV; ◆, V; □, VI; \*, VII
